# Supplementary material for: Highly transparent phototransistor based on quantum-dots and ZnO bilayers for optical logic gate operation in visible-light
Source: Royal Society of Chemistry journal article supplement (doi:10.1039/d0ra01756f), 2020-01-01
Supplement: d0ra01756f1.pdf [file d0ra01756f1.pdf]

## Supplementary Information

### Highly transparent phototransistor based on quantum-dots and ZnO bilayer for optical logic gate operation in visible-light

*Byung Jun Kim<sup>a,#</sup>, Nam-Kwang Cho<sup>b,#</sup>, Sungho Park<sup>a</sup>, Shinyoung Jeong<sup>c</sup>, Dohyeon Jeon<sup>d</sup>, Yebin Kang<sup>d</sup>, Taekyeong Kim<sup>d</sup>, Youn Sang Kim<sup>b</sup>, Il Ki Han<sup>c</sup> and Seong Jun Kang<sup>a,\*</sup>*

<sup>a</sup> Department of Advanced Materials Engineering for Information and Electronics, Kyung Hee University, Yongin 17101, Republic of Korea

<sup>b</sup> Program in Nano Science and Technology, Graduate School of Convergence Science and Technology, Seoul National University, Seoul 08826, Republic of Korea

<sup>c</sup> Nanophotonics Research Center, Korea Institute of Science and Technology (KIST), Seoul 02792, Republic of Korea

<sup>d</sup> Department of Physics, Hankuk University of Foreign Studies, Yongin 17035, Republic of Korea

\*The author is corresponding author (E-mail: [junknag@khu.ac.kr](mailto:junknag@khu.ac.kr), Tel: +82-31-201-3324)

#These authors equally contributed to this work.

## Supplementary Note 1

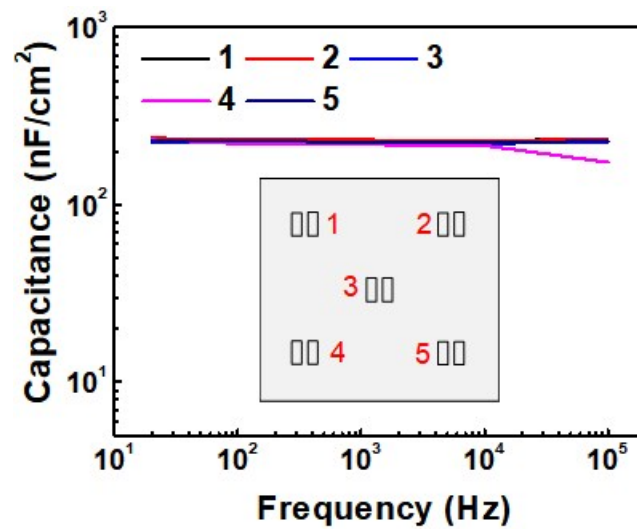

**Figure S1.** Capacitance versus frequency in various regions of an Al<sub>2</sub>O<sub>3</sub> film. Each of the regions has an average capacitance of ~175 nF/cm<sup>2</sup> at 100 Hz. Al<sub>2</sub>O<sub>3</sub> is uniformly deposited over the entire film, so each region can generally serve as a gate dielectric layer.

## Supplementary Note 2

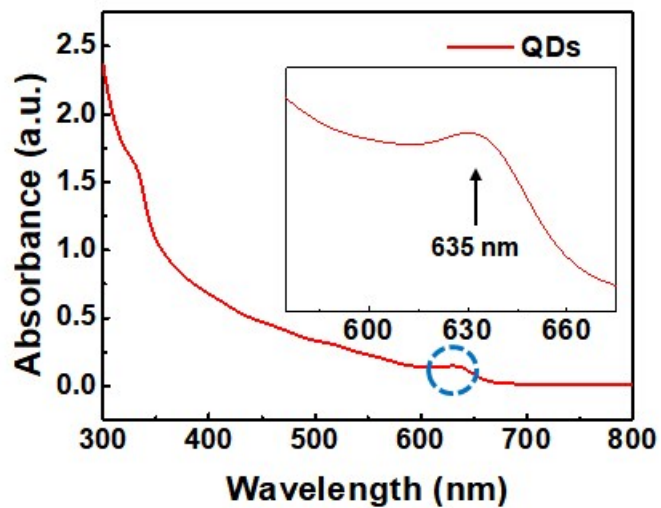

**Figure S2.** UV-vis absorption spectrum of a pure CdSe/ZnS QDs solution. The absorption spectrum from 600 to 660 nm is shown in the inset.

### Supplementary Note 3

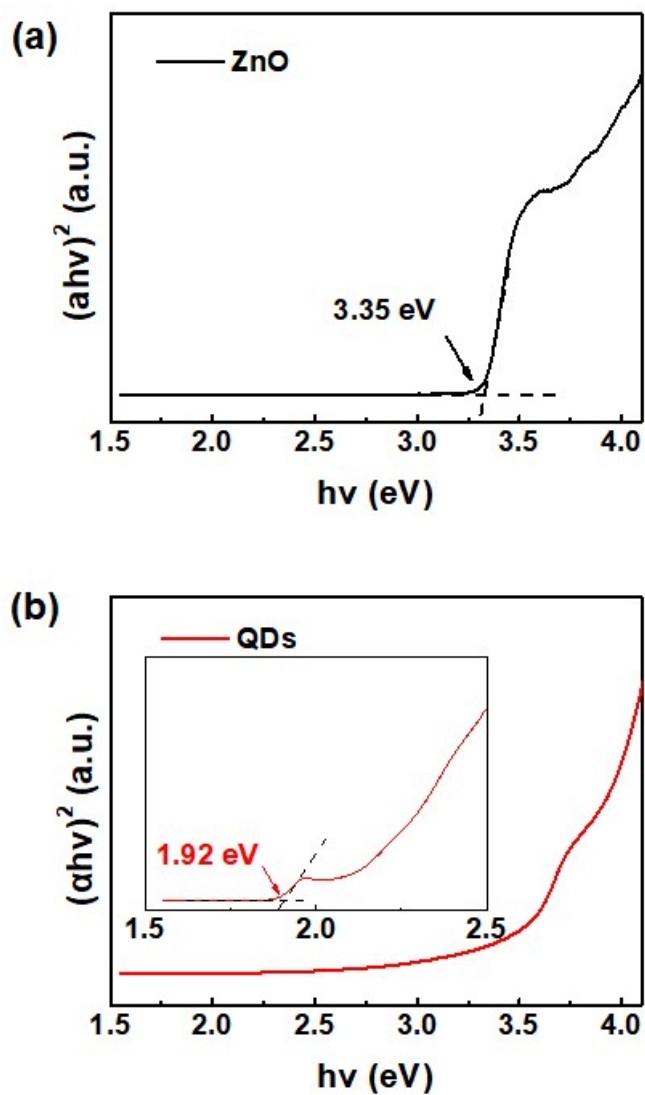

**Figure S3.** Tauc plots calculated from the  $(\alpha h\nu)^2$  values of a) ZnO and b) the QD layer. The Tauc plot of the QD layer from 1.5 to 2.5 eV is shown in the inset of (b).
